# Supplementary material
Source: publisher site journal article supplement (https://www.dovepress.com/article/387246)

Supplement Figure 1. The fluorescence-activated cell sorting (FACS) graphs illustrating cellular uptake percentages of different nano systems.


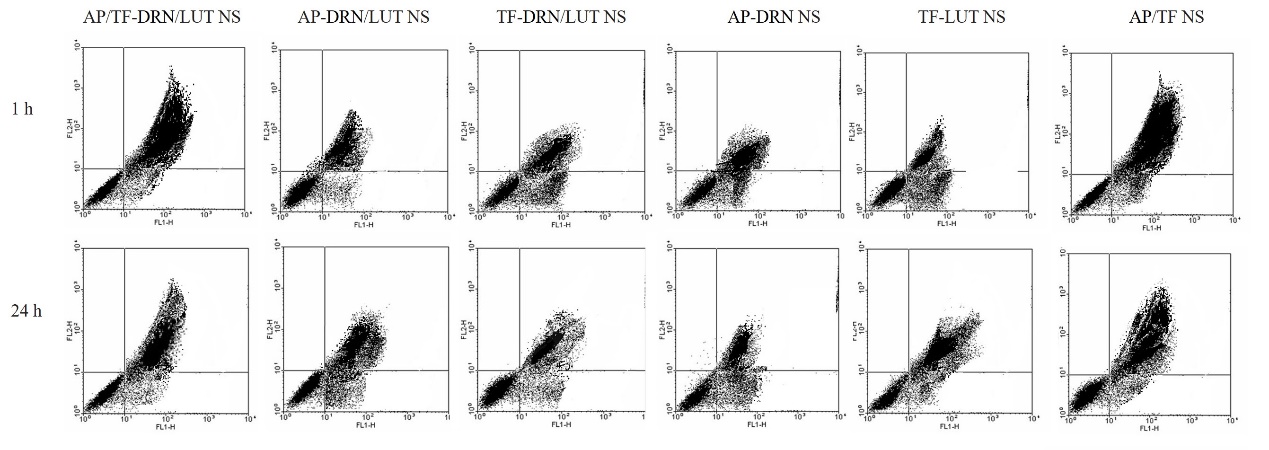

Supplement: Supplementary file 1 [file get_supplementary_file.php]
